# Supplementary material
Source: publisher site journal article supplement (https://www.dovepress.com/article/444580)
Supplement: Supplementary file 1 [file get_supplementary_file.php]

## Supplement 1

### FRAIL Scale

|                                                                                                                                                                                                            |                                                                                                                                                                                     |
|------------------------------------------------------------------------------------------------------------------------------------------------------------------------------------------------------------|-------------------------------------------------------------------------------------------------------------------------------------------------------------------------------------|
| Fatigue                                                                                                                                                                                                    | How much of the time during the past 4 weeks did you feel tired? (all of the time, most of the time = 1 point; some of the time, on very few occasions, none of the time = 0 point) |
| Resistance                                                                                                                                                                                                 | Do you have any difficulty walking up 10 steps alone without resting and without aids? (Yes = 1 point; No = 0 point)                                                                |
| Ambulation                                                                                                                                                                                                 | By yourself and not using aids, do you have any difficulty walking several hundred yards? (Yes = 1 point; No = 0 point)                                                             |
| Illness                                                                                                                                                                                                    | Did a doctor ever tell you that you have the following illness? (5 or more = 1 point; 0 - 4 = 0 point)                                                                              |
| Loss of weight                                                                                                                                                                                             | Have you inadvertently lost more than 5kg or 5% of your body weight in the past year? (Yes = 1 point; No = 0 point)                                                                 |
| (The illnesses include hypertension, diabetes, cancer (other than minor skin cancer), chronic lung disease, heart attack, congestive heart failure, angina, asthma, arthritis, stroke, and kidney disease) |                                                                                                                                                                                     |
| SCORING:    ROBUST = 0    PRE-FRAIL = 1-2    FRAIL = > 3                                                                                                                                                   |                                                                                                                                                                                     |

## Supplement 2

### The modified patient-reported outcome scale for chronic obstructive pulmonary disease (mCOPD-PRO)

Please read each question below and place a mark (✕) below the number of the response or in the box that best describes how you have been feeling during the **past 2 weeks**. Be sure to only select **one** response for each question.

**Example:** Did you have panting?

|            |                  |                    |                 |                          |
|------------|------------------|--------------------|-----------------|--------------------------|
| Never<br>0 | Hardly ever<br>1 | Several times<br>2 | Many times<br>3 | Almost all the time<br>4 |
|            |                  |                    | ✕               |                          |

#### **Section 1 Physiological domain**

1. Did you cough?

|            |                  |                    |                 |                          |
|------------|------------------|--------------------|-----------------|--------------------------|
| Never<br>0 | Hardly ever<br>1 | Several times<br>2 | Many times<br>3 | Almost all the time<br>4 |
|------------|------------------|--------------------|-----------------|--------------------------|

2. Did you have phlegm?

|            |                  |                    |                 |                          |
|------------|------------------|--------------------|-----------------|--------------------------|
| Never<br>0 | Hardly ever<br>1 | Several times<br>2 | Many times<br>3 | Almost all the time<br>4 |
|------------|------------------|--------------------|-----------------|--------------------------|

3. Did you have chest tightness?

|            |                  |                    |                 |                          |
|------------|------------------|--------------------|-----------------|--------------------------|
| Never<br>0 | Hardly ever<br>1 | Several times<br>2 | Many times<br>3 | Almost all the time<br>4 |
|------------|------------------|--------------------|-----------------|--------------------------|

4. Did you have panting?

|            |                  |                    |                 |                          |
|------------|------------------|--------------------|-----------------|--------------------------|
| Never<br>0 | Hardly ever<br>1 | Several times<br>2 | Many times<br>3 | Almost all the time<br>4 |
|------------|------------------|--------------------|-----------------|--------------------------|

5. Did you get short of breath?

|            |                  |                    |                 |                          |
|------------|------------------|--------------------|-----------------|--------------------------|
| Never<br>0 | Hardly ever<br>1 | Several times<br>2 | Many times<br>3 | Almost all the time<br>4 |
|------------|------------------|--------------------|-----------------|--------------------------|

6. Did you feel weak when you talk?

|            |                  |                    |                 |                          |
|------------|------------------|--------------------|-----------------|--------------------------|
| Never<br>0 | Hardly ever<br>1 | Several times<br>2 | Many times<br>3 | Almost all the time<br>4 |
|------------|------------------|--------------------|-----------------|--------------------------|

7. Did you have fatigue?

|            |                  |                    |                 |                          |
|------------|------------------|--------------------|-----------------|--------------------------|
| Never<br>0 | Hardly ever<br>1 | Several times<br>2 | Many times<br>3 | Almost all the time<br>4 |
|------------|------------------|--------------------|-----------------|--------------------------|

8. Did you feel that you were in a poor spirit?

|            |                  |                    |                 |                          |
|------------|------------------|--------------------|-----------------|--------------------------|
| Never<br>0 | Hardly ever<br>1 | Several times<br>2 | Many times<br>3 | Almost all the time<br>4 |
|------------|------------------|--------------------|-----------------|--------------------------|

9. Did you notice cyanosis (your lips, nails, skin, etc. turned purple? )

|                 |                  |               |              |                   |
|-----------------|------------------|---------------|--------------|-------------------|
| Not at all<br>0 | Very slight<br>1 | Moderate<br>2 | Obvious<br>3 | Very obvious<br>4 |
|-----------------|------------------|---------------|--------------|-------------------|

10. Were you afraid of the wind (cold)?

|            |                  |                    |                 |                          |
|------------|------------------|--------------------|-----------------|--------------------------|
| Never<br>0 | Hardly ever<br>1 | Several times<br>2 | Many times<br>3 | Almost all the time<br>4 |
|------------|------------------|--------------------|-----------------|--------------------------|

11. Did you have abdominal distension?

|            |                  |                    |                 |                          |
|------------|------------------|--------------------|-----------------|--------------------------|
| Never<br>0 | Hardly ever<br>1 | Several times<br>2 | Many times<br>3 | Almost all the time<br>4 |
|------------|------------------|--------------------|-----------------|--------------------------|

12. Did you often catch cold?

|            |                  |                    |                 |                          |
|------------|------------------|--------------------|-----------------|--------------------------|
| Never<br>0 | Hardly ever<br>1 | Several times<br>2 | Many times<br>3 | Almost all the time<br>4 |
|------------|------------------|--------------------|-----------------|--------------------------|

13. Could you go outdoors alone? (walking, going shopping, having a haircut, taking a bus, etc.)

|            |                  |                    |                 |                          |
|------------|------------------|--------------------|-----------------|--------------------------|
| Never<br>0 | Hardly ever<br>1 | Several times<br>2 | Many times<br>3 | Almost all the time<br>4 |
|------------|------------------|--------------------|-----------------|--------------------------|

14. These are questions about the effects of daily activities on your condition.

|                                                     | Never<br>0            | Hardly<br>ever<br>1   | Several<br>times<br>2 | Many<br>times<br>3    | Almost all the<br>time<br>4 |
|-----------------------------------------------------|-----------------------|-----------------------|-----------------------|-----------------------|-----------------------------|
| 14.1 Was your cough aggravated by daily activities? | <input type="radio"/>       |

|                                                                   |                       |                       |                       |                       |                       |
|-------------------------------------------------------------------|-----------------------|-----------------------|-----------------------|-----------------------|-----------------------|
| 14.2 Was your chest tightness aggravated by daily activities?     | <input type="radio"/> |
| 14.3 Was your panting aggravated by daily activities?             | <input type="radio"/> |
| 14.4 Was your shortness of breath aggravated by daily activities? | <input type="radio"/> |

**Section 2 Psychological domain**

15. Did you often feel upset?

|            |                  |                    |                 |                          |
|------------|------------------|--------------------|-----------------|--------------------------|
| Never<br>0 | Hardly ever<br>1 | Several times<br>2 | Many times<br>3 | Almost all the time<br>4 |
|------------|------------------|--------------------|-----------------|--------------------------|

16. Did you often feel sad?

|            |                  |                    |                 |                          |
|------------|------------------|--------------------|-----------------|--------------------------|
| Never<br>0 | Hardly ever<br>1 | Several times<br>2 | Many times<br>3 | Almost all the time<br>4 |
|------------|------------------|--------------------|-----------------|--------------------------|

17. Did you worry about your illness?

|            |                  |                    |                 |                          |
|------------|------------------|--------------------|-----------------|--------------------------|
| Never<br>0 | Hardly ever<br>1 | Several times<br>2 | Many times<br>3 | Almost all the time<br>4 |
|------------|------------------|--------------------|-----------------|--------------------------|

18. These are questions about the effects of mood swings on your condition.

|                                                          | Never<br>0            | Hardly ever<br>1      | Several times<br>2    | Many times<br>3       | Almost all the time<br>4 |
|----------------------------------------------------------|-----------------------|-----------------------|-----------------------|-----------------------|--------------------------|
| 18.1 Was your cough aggravated by mood swings?           | <input type="radio"/>    |
| 18.2 Was your chest tightness aggravated by mood swings? | <input type="radio"/>    |
| 18.3 Was your panting aggravated by mood swings?         | <input type="radio"/>    |

|                                                              |                       |                       |                       |                       |                       |
|--------------------------------------------------------------|-----------------------|-----------------------|-----------------------|-----------------------|-----------------------|
| 18.4 Was your shortness of breath aggravated by mood swings? | <input type="radio"/> |
|--------------------------------------------------------------|-----------------------|-----------------------|-----------------------|-----------------------|-----------------------|

**Section 3 Environmental domain**

19. Did the illness affect your contacts with friends, colleagues or neighbors?

|            |                  |                    |                 |                          |
|------------|------------------|--------------------|-----------------|--------------------------|
| Never<br>0 | Hardly ever<br>1 | Several times<br>2 | Many times<br>3 | Almost all the time<br>4 |
|------------|------------------|--------------------|-----------------|--------------------------|

20. Would your illness be affected by weather changes (cloudy, smoggy, damp and sultry days, etc.)?

|            |                  |                    |                 |                          |
|------------|------------------|--------------------|-----------------|--------------------------|
| Never<br>0 | Hardly ever<br>1 | Several times<br>2 | Many times<br>3 | Almost all the time<br>4 |
|------------|------------------|--------------------|-----------------|--------------------------|

21. Would your illness get worse when in a closed or poorly ventilated environment?

|            |                  |                    |                 |                          |
|------------|------------------|--------------------|-----------------|--------------------------|
| Never<br>0 | Hardly ever<br>1 | Several times<br>2 | Many times<br>3 | Almost all the time<br>4 |
|------------|------------------|--------------------|-----------------|--------------------------|

**The end**

*Thank you for your participation!*

Notes: Reprinted with permission from Dove Medical Press. Li J, Wang J, Xie Y, Feng Z. Development and validation of the modified patient-reported outcome scale for chronic obstructive pulmonary disease (mCOPD-PRO). *Int J Chron Obstruct Pulmon Dis.* 2020;15:661–669.<sup>22</sup>
